# Supplementary material
Source: Springer Nature journal article supplement (https://www.springermedizin.de/resource/supplementary/12990_2009_250_MOESM6_ESM.pdf/9612882)

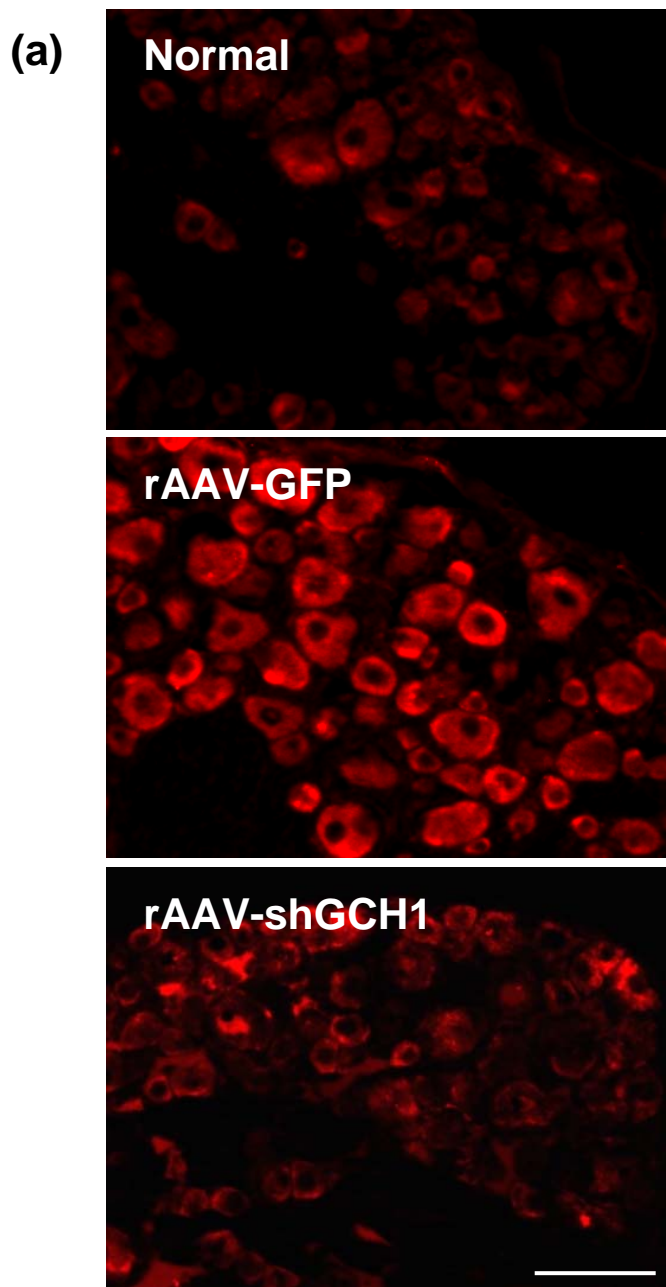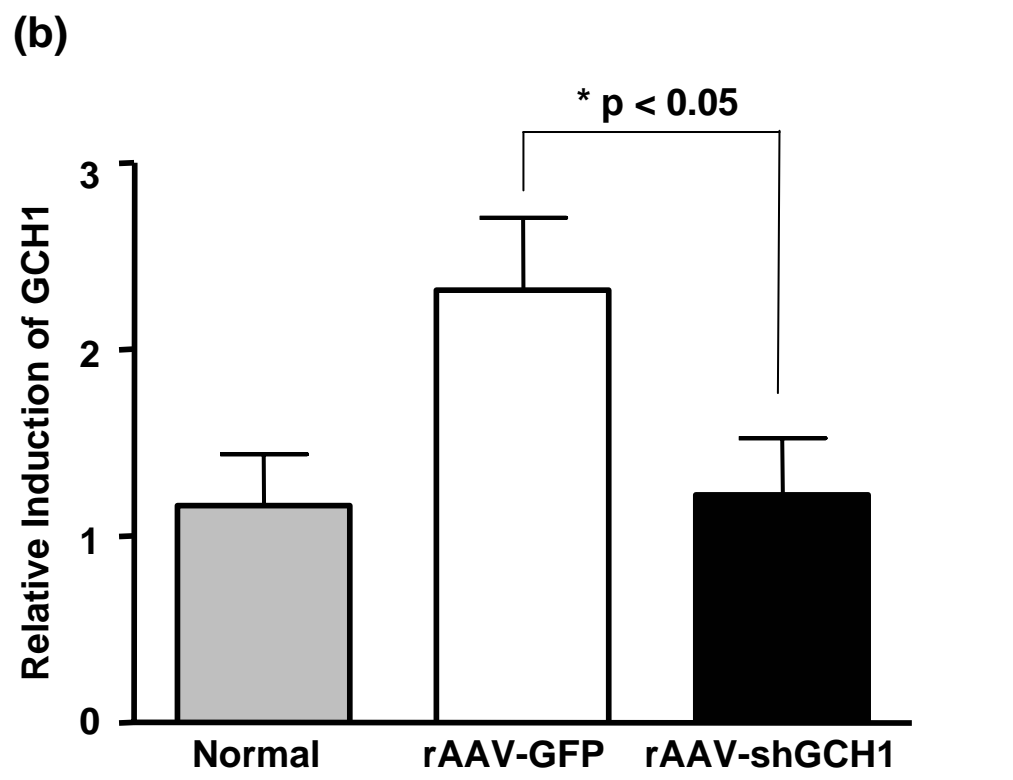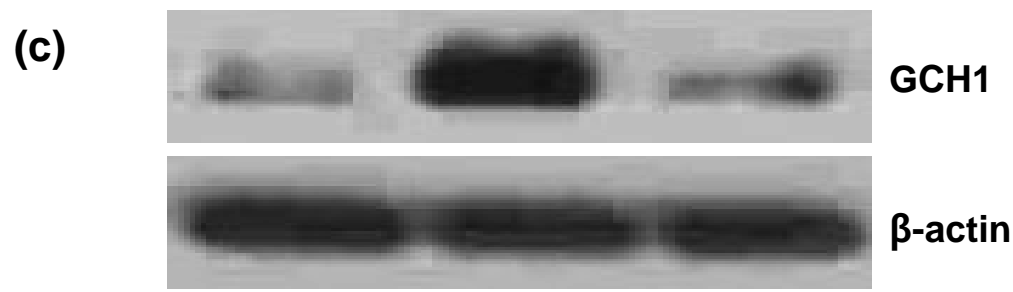

Supplement: MOESM6 [file 9612882]
